# Supplementary material
Source: PubMed Central journal article supplement (PMC3784611)

## Supplementary Information

Double Electron-Electron Resonance Reveals  $\text{Ca}^{2+}$ -induced Conformational Changes and  
Dimerization of Recoverin<sup>†</sup>

William K. Myers, Xianzhong Xu, Congmin Li, Jens O. Lagerstedt, Madhu S. Budamagunta,  
John C. Voss, R. David Britt\* and James B. Ames\*

Department of Chemistry, University of California, Davis, CA 95616.

Running title:  $\text{Ca}^{2+}$ -induced Structural Changes in Recoverin Probed by DEER

<sup>†</sup>This work was supported by NIH grants EY012347 (J.B.A.) and RR11973 (UC Davis NMR),  
and DOE grant DE-FG02-09ER16117 (R.D.B.).

\*To whom correspondence should be addressed. Tel: (530) 752-6358. Fax: (530) 752-8995. E-mail: [jbames@ucdavis.edu](mailto:jbames@ucdavis.edu) or [rdbritt@ucdavis.edu](mailto:rdbritt@ucdavis.edu)

**Figure S1.** Overlay of  $^{15}\text{N}$ - $^1\text{H}$  HSQC NMR spectra of  $\text{Ca}^{2+}$ -free myristoylated wildtype recoverin (red) and recoverin $^{\text{N120C}}$  (blue). The sample conditions and procedures for the NMR experiments were the same as used by Ref 44.

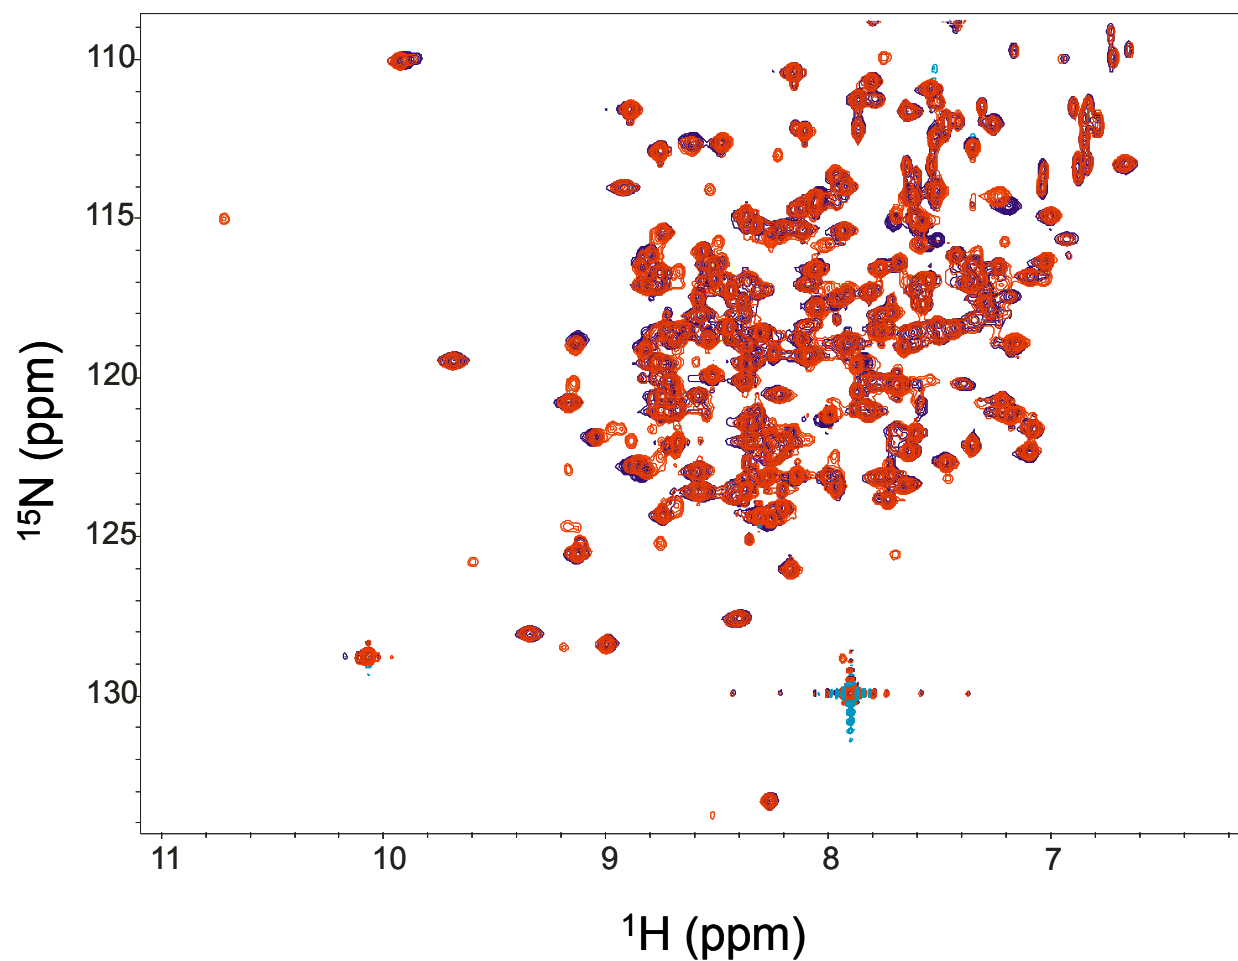

**Figure S2.** Scatchard analysis for  $\text{Ca}^{2+}$  binding to wildtype myristoylated recoverin (solid squares) and recoverin<sup>N120C</sup> (cross marks). The sample conditions and experimental procedure were the same as used by Ref 19. The recoverin<sup>N120C</sup> binding data were fit to the Hill model (dotted line) using apparent dissociation constant of  $20 \pm 2 \mu\text{M}$  and Hill coefficient of 1.5. Wildtype myristoylated recoverin has an apparent dissociation constant of  $17 \pm 2 \mu\text{M}$  (ref 19).

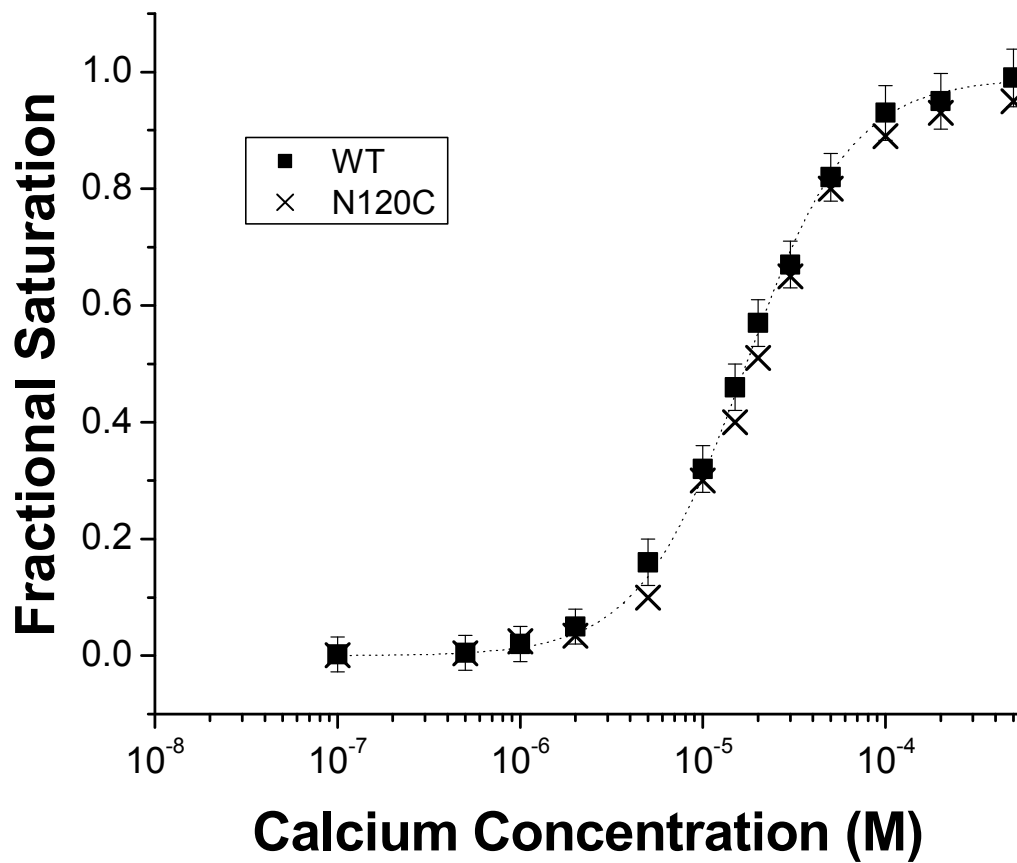

**Figure S3.** Experimental DEER traces at 50K for a sample prepared separately from that in the main text. Amplitude-normalized data, the background-subtraction and the frequency domain are shown. (a) apo-recoverin (b)  $\text{Ca}^{2+}$ -bound recoverin.

(a)

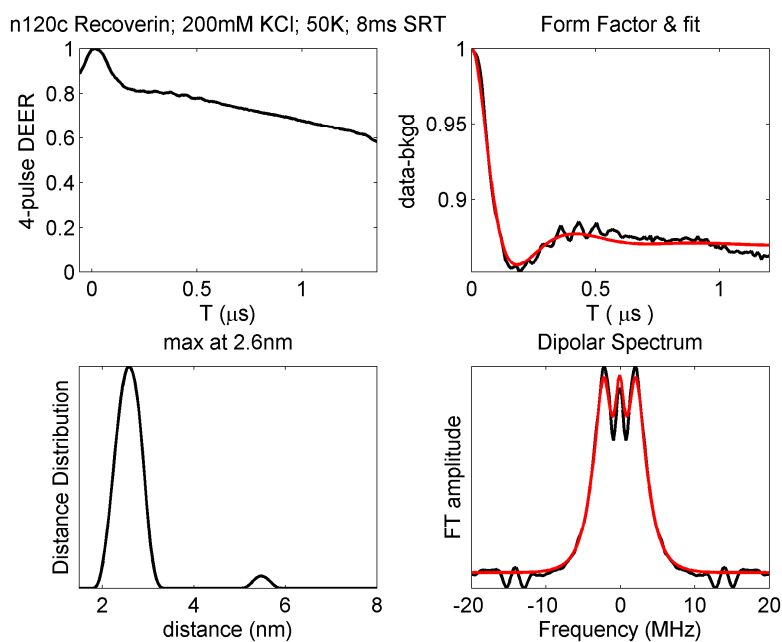

(b)

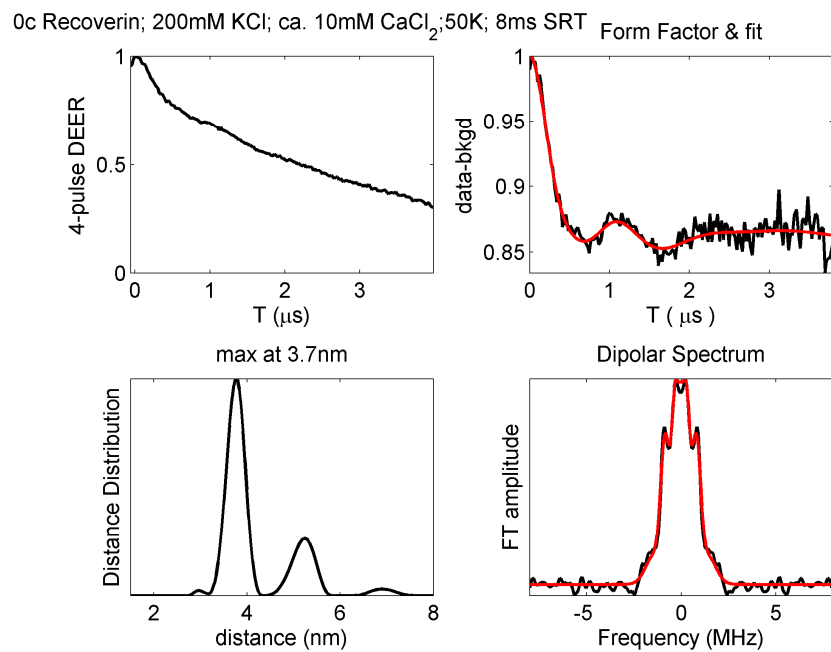

**Figure S4.** A Q-band DEER trace for  $\tau_2=11\mu\text{sec}$ , measured at 50K (pump=20ns, probe=16ns and 32ns) from same sample as in main text (transferred to a 1.6mm O.D. tube). The panels are as follows, (a) raw data divided by its max (black) and the optimized 3-D homogenous background subtraction line (red), (b) background subtracted data with a Tikhonov Regularization fit to the data and (c) a distance distribution including validation data. For c., the grey error bars about the mean distribution (in black) indicate the full variation of the probability of a given distance over all trials from starting the background subtraction and varying the noise level. A lower error estimate corresponding to the mean value of the probability minus two times its standard deviation ( $2\sigma$ ), and an upper error estimate corresponding to the mean value  $+2\sigma$ , (red lines).

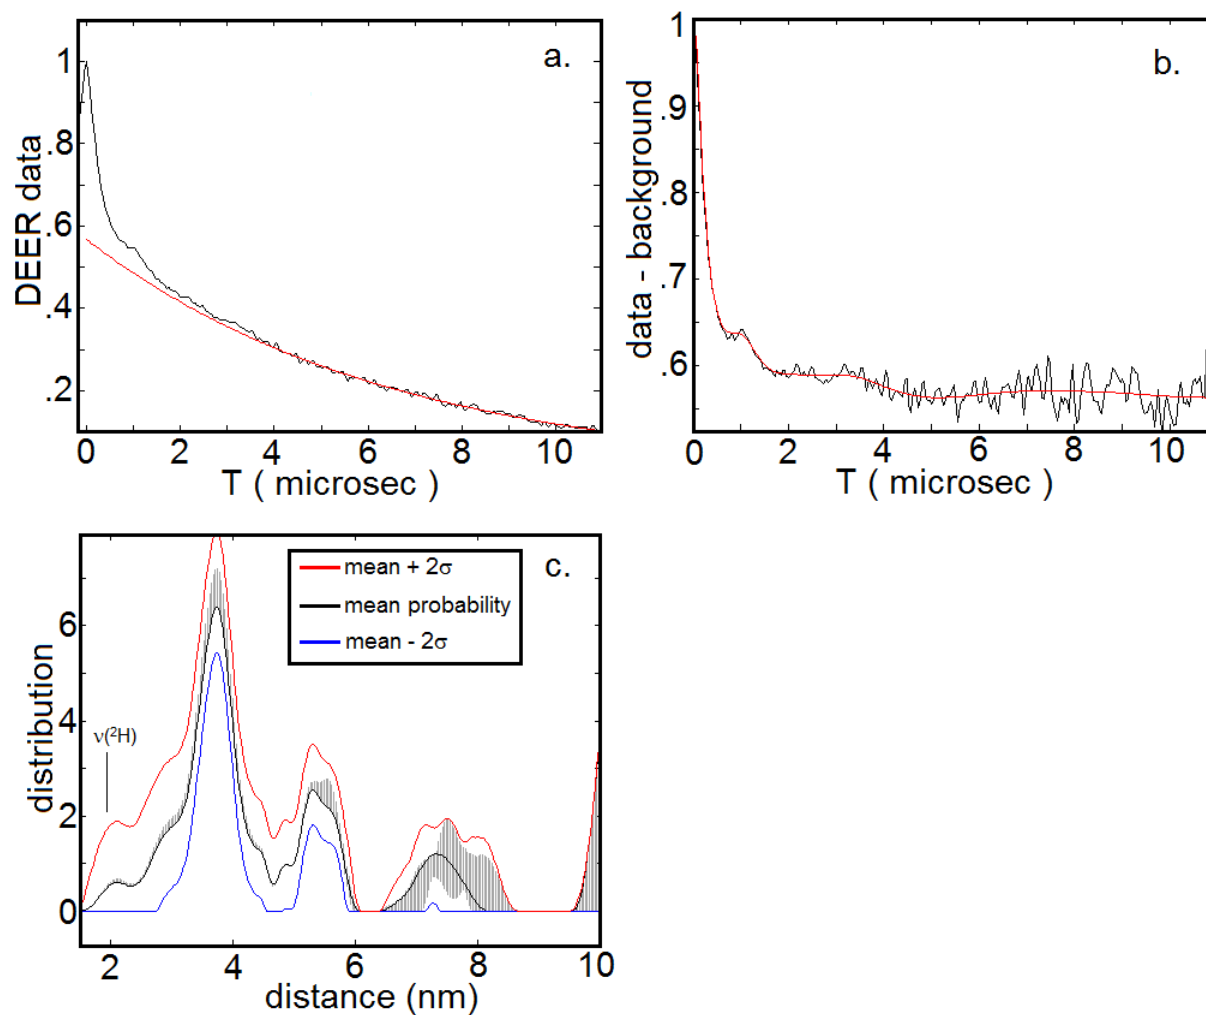

Supplement: NIHMS516506-supplement-1_si_001.pdf [file NIHMS516506-supplement-1_si_001.pdf]
